# Supplementary material for: Assessment of the Diffuse Attenuation Coefficient of Photosynthetically Active Radiation in a Chilean Lake
Source: MDPI journal article supplement (doi:10.3390/rs14184568), 2022-09-13
Supplement: s1 [file s1]

## Supplementing Information

**Table S1.** Operational characteristics of radiometric sensors.

| Features                         | PAR                                                                                        |
|----------------------------------|--------------------------------------------------------------------------------------------|
| Manufacturer                     | Apogee Instrument                                                                          |
| Models                           | SQ-500-SS                                                                                  |
| Spectral Range (nm)              | 389 to 692                                                                                 |
| Response time (ms)               | Less than 1                                                                                |
| Directional (cosine)<br>Response | ± 5 % at 75° solar zenith angle                                                            |
| Operating Environ-<br>ment       | -40 to 70 °C; 0 to 100 % relative humidity; can be submerged in water up to depths of 30 m |
| Units                            | mmol/m <sup>2</sup>                                                                        |

**Table S2.** Landsat and Sentinel images characteristics and in situ measurements.

| Landsat Image ID                         | Year | Path/Row | In situ<br>Date            | Image<br>Date | Days differ-<br>ences |
|------------------------------------------|------|----------|----------------------------|---------------|-----------------------|
| LC08_L1TP_233087_20170306_20200905_02_T1 | 2017 | 233/87   | 1st Mar                    | 6 Mar         | ±5                    |
| LC08_L1TP_232087_20171025_20200902_02_T1 |      | 232/87   | 17 Oct<br>19 Oct           | 25 Oct        | ±8<br>±6              |
| LC08_L1TP_233087_20180221_20200902_02_T1 |      | 233/87   | 27 Feb<br>28 Feb           | 21 Feb        | ±6<br>±7              |
| LC08_L1TP_232087_20180302_20200902_02_T1 | 2018 | 232/87   | 27 Feb<br>28 Feb           | 2 Mar         | ±3<br>±2              |
| LC08_L1TP_233087_20181019_20200830_02_T1 |      | 233/87   | 23 Oct<br>24 Oct           | 19 Oct        | ±4<br>±5              |
| LC08_L1TP_233087_20190123_20200830_02_T1 |      | 233/87   | 28 Jan<br>29 Jan           | 23 Jan        | ±5<br>±6              |
| LC08_L1TP_233087_20190224_20200829_02_T1 | 2019 | 233/87   | 26 Feb<br>27 Feb           | 24 Feb        | ±2<br>±3              |
| LC08_L1TP_233087_20191123_20200825_02_T1 |      | 233/87   | 19 Nov<br>20 Nov           | 23 Nov        | ±4<br>±3              |
| LC08_L1TP_233087_20191209_20200824_02_T1 |      | 233/87   | 3 Dec<br>4 Dec             | 9 Dec         | ±6<br>±5              |
| LC08_L1TP_233087_20200126_20200823_02_T1 | 2020 | 233/87   | 28 Jan<br>29 Jan           | 26 Jan        | ±2<br>±3              |
| LC08_L1TP_233087_20200227_20200822_02_T1 |      | 233/87   | 24 Feb<br>26 Feb           | 27 Feb        | ±3<br>±1              |
| LC08_L1TP_233087_20200314_20200822_02_T1 |      | 233/87   | 27 Feb<br>14 Mar           | 14 Mar        | ±0<br>±0              |
| LC08_L1TP_233087_20201109_20210317_02_T1 |      | 233/87   | 10 Nov<br>11 Nov<br>12 Nov | 9 Nov         | ±1<br>±2<br>±3        |
| LC08_L1TP_232087_20201118_20210315_02_T1 |      | 233/87   | 24 Nov                     | 18 Nov        | ±6                    |
| LC08_L1TP_232087_20201204_20210313_02_T1 |      | 233/87   | 26 Nov                     | 4 Dec         | ±8                    |

| Sentinel Image ID                                            | Year | Title/Subtitle | In situ Date     | Image Date | Days differences |
|--------------------------------------------------------------|------|----------------|------------------|------------|------------------|
| S2A_MSIL1C_20170307T142851_N0204_R053_T18HYB_20170307T143353 | 2017 | 18/HYB         | 1st Mar          | 7 Mar      | ±6               |
| S2B_MSIL1C_20171021T143739_N0205_R096_T18HYB_20171021T144945 |      | 18/HYB         | 17 Oct<br>19 Oct | 21 Oct     | ±4<br>±2         |
| S2A_MSIL1C_20180223T143751_N0206_R096_T18HYB_20180223T193944 | 2018 | 19/HBS         | 27 Feb<br>28 Feb | 23 Feb     | ±4<br>±5         |
| S2A_MSIL1C_20180302T142851_N0206_R053_T19HBS_20180302T192732 |      | 19/HBS         | 27 Mar<br>28 Mar | 2 Mar      | ±3<br>±2         |
| -                                                            |      | -              | 23 Oct<br>24 Oct | -          | -<br>-           |
| S2A_MSIL1C_20190126T142751_N0207_R053_T18HYB_20190126T174932 | 2019 | 18/HYB         | 28 Jan           | 26 Jan     | ±2               |
| S2B_MSIL1C_20190131T142759_N0207_R053_T19HBS_20190131T175239 |      | 19/HBS         | 29 Jan           | 31 Jan     | ±2               |
| S2A_MSIL1C_20190225T142751_N0207_R053_T18HYB_20190225T175237 |      | 18/HYB         | 26 Feb           | 25 Feb     | ±1               |
| S2A_MSIL1C_20190228T143751_N0207_R096_T18HYB_20190228T180016 |      | 18/HYB         | 27 Feb           | 28 Feb     | ±1               |
| S2B_MSIL1C_20191120T143729_N0208_R096_T18HYB_20191120T180001 |      | 18/HYB         | 19 Nov<br>20 Nov | 20 Nov     | ±1<br>±0         |
| S2B_MSIL1C_20191207T142729_N0208_R053_T19HBS_20191207T175009 |      | 19/HBS         | 3 Dec<br>4 Dec   | 7 Dec      | ±4<br>±3         |
| S2A_MSIL1C_20200124T143651_N0208_R096_T18HYB_20200124T175925 | 2020 | 18/HYB         | 28 Jan           | 24 Jan     | ±4               |
| S2B_MSIL1C_20200129T143659_N0208_R096_T18HYB_20200129T175853 |      | 18/HYB         | 29 Jan           | 29 Jan     | ±0               |
| S2A_MSIL1C_20200220T142651_N0209_R053_T19HBS_20200220T175302 |      | 19/HBS         | 24 Feb           | 20 Feb     | ±4               |
| S2B_MSIL1C_20200225T142729_N0209_R053_T19HBS_20200225T175306 |      | 19/HBS         | 26 Feb           | 25 Feb     | ±1               |
| S2B_MSIL1C_20200228T143729_N0209_R096_T18HYB_20200228T175923 |      | 18/HYB         | 27 Feb           | 28 Feb     | ±1               |
| S2A_MSIL1C_20200314T143721_N0209_R096_T18HYB_20200314T180039 |      | 18/HYB         | 14 Mar           | 14 Mar     | ±0               |
| S2B_MSIL1C_20201015T143729_N0209_R096_T18HYB_20201015T181134 |      | 18/HYB         | 19 Oct           | 15 Oct     | ±4               |
| S2A_MSIL1C_20201020T143731_N0209_R096_T18HYB_20201020T181238 |      | 18/HYB         | 20 Oct           | 20 Oct     | ±0               |
| S2A_MSIL1C_20201106T142741_N0209_R053_T19HBS_20201106T181041 |      | 19/HBS         | 10 Nov           | 6 Nov      | ±4               |
| S2A_MSIL1C_20201116T142731_N0209_R053_T19HBS_20201116T175834 |      | 19/HBS         | 11 Nov           | 16 Nov     | ±5               |
| S2A_MSIL1C_20201119T143731_N0209_R096_T18HYB_20201119T181130 |      | 18/HYB         | 12 Nov           | 19 Nov     | ±7               |
| S2A_MSIL1C_20201126T142731_N0209_R053_T19HBS_20201126T180345 |      | 19/HBS         | 24 Nov           | 26 Nov     | ±2               |
| S2A_MSIL1C_20201126T142731_N0209_R053_T19HBS_20201126T180345 |      | 19/HBS         | 26 Nov           | 26 Nov     | ±0               |

# QAA v5 KdPAR Nechad

Summer

Spring

a)

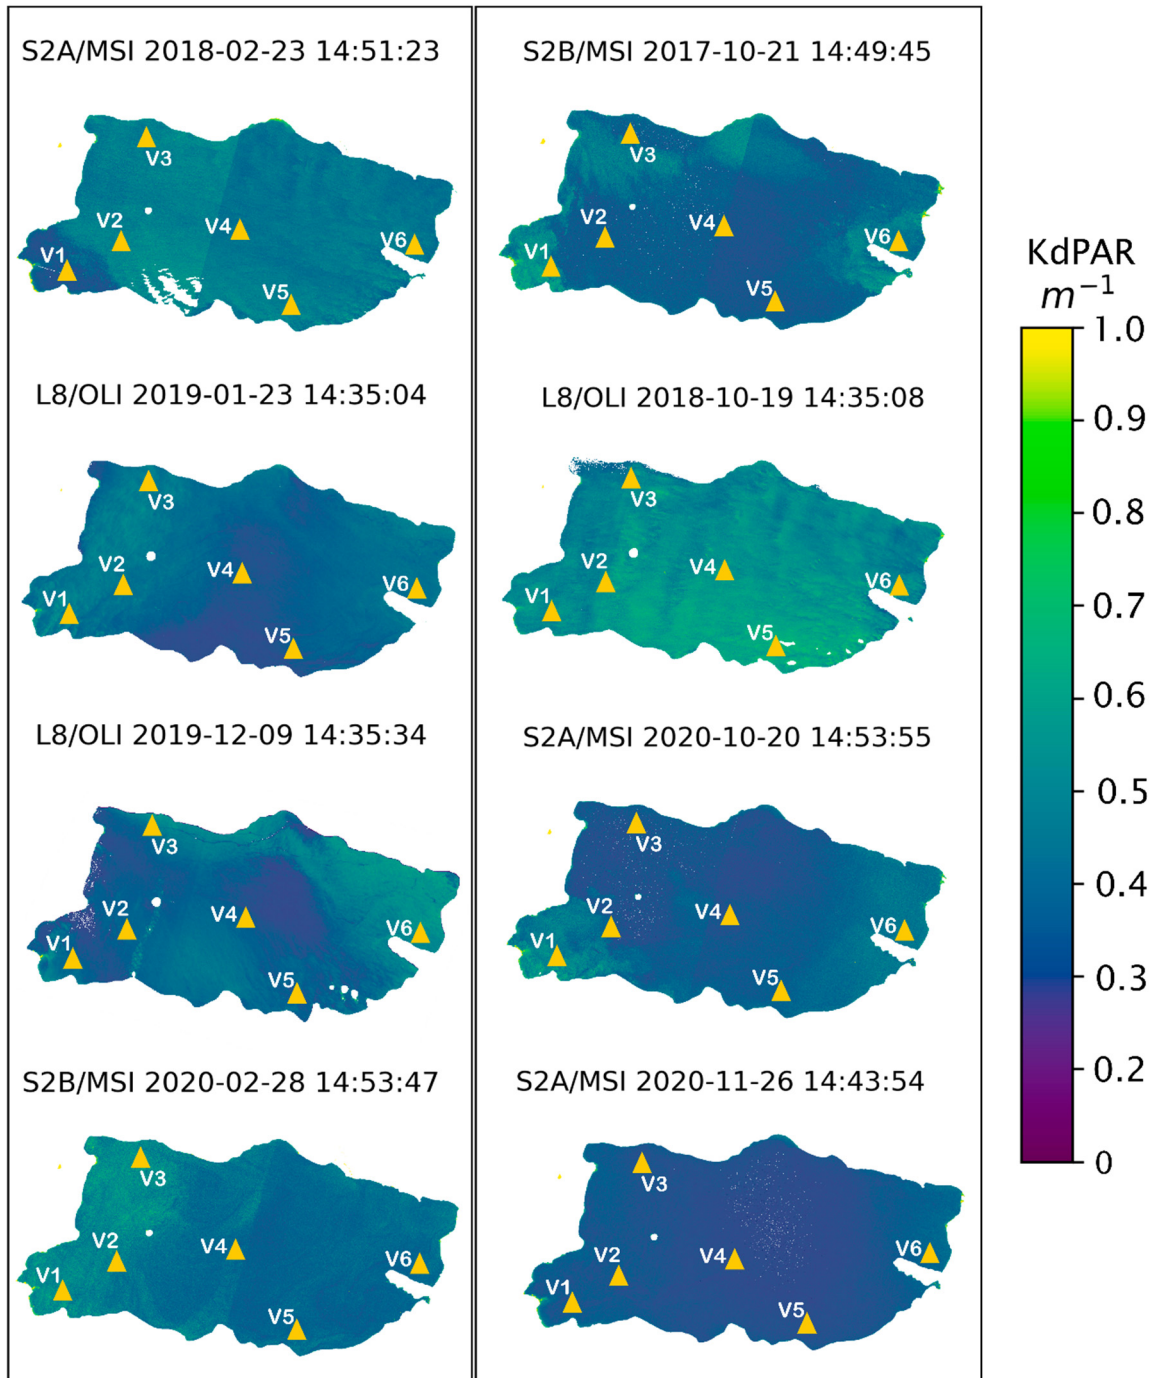

# QAA v6 KdPAR Nechad

Summer

Spring

b)

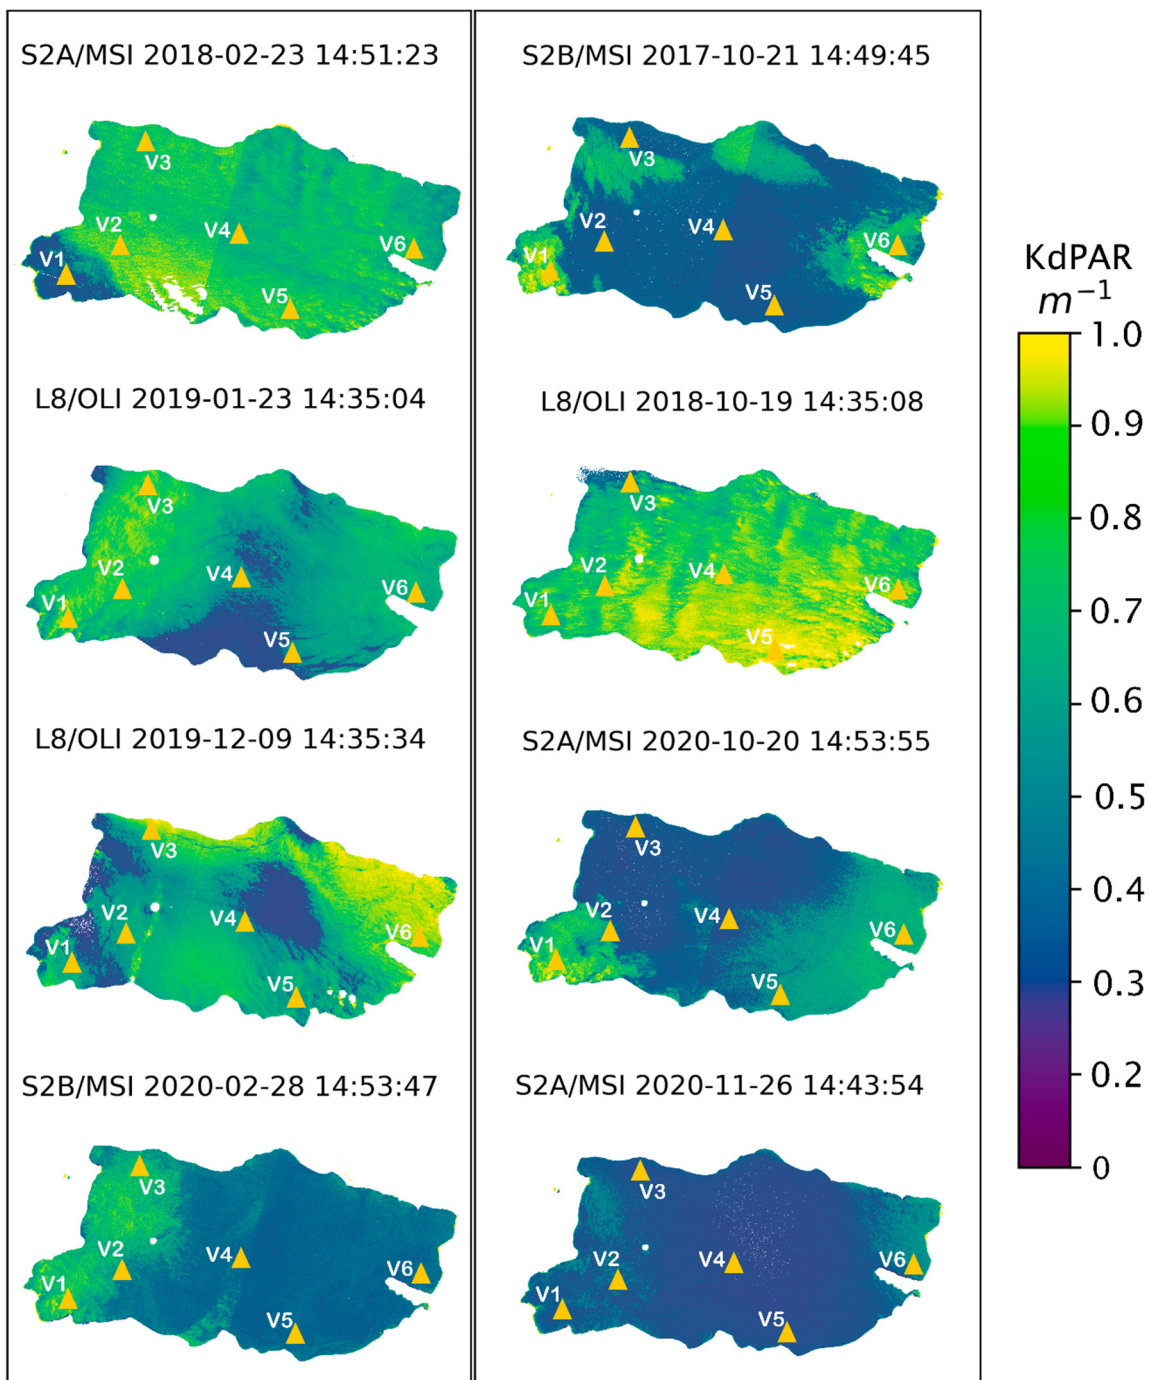

QAA v5 Kd 490nm

c)

Summer

Spring

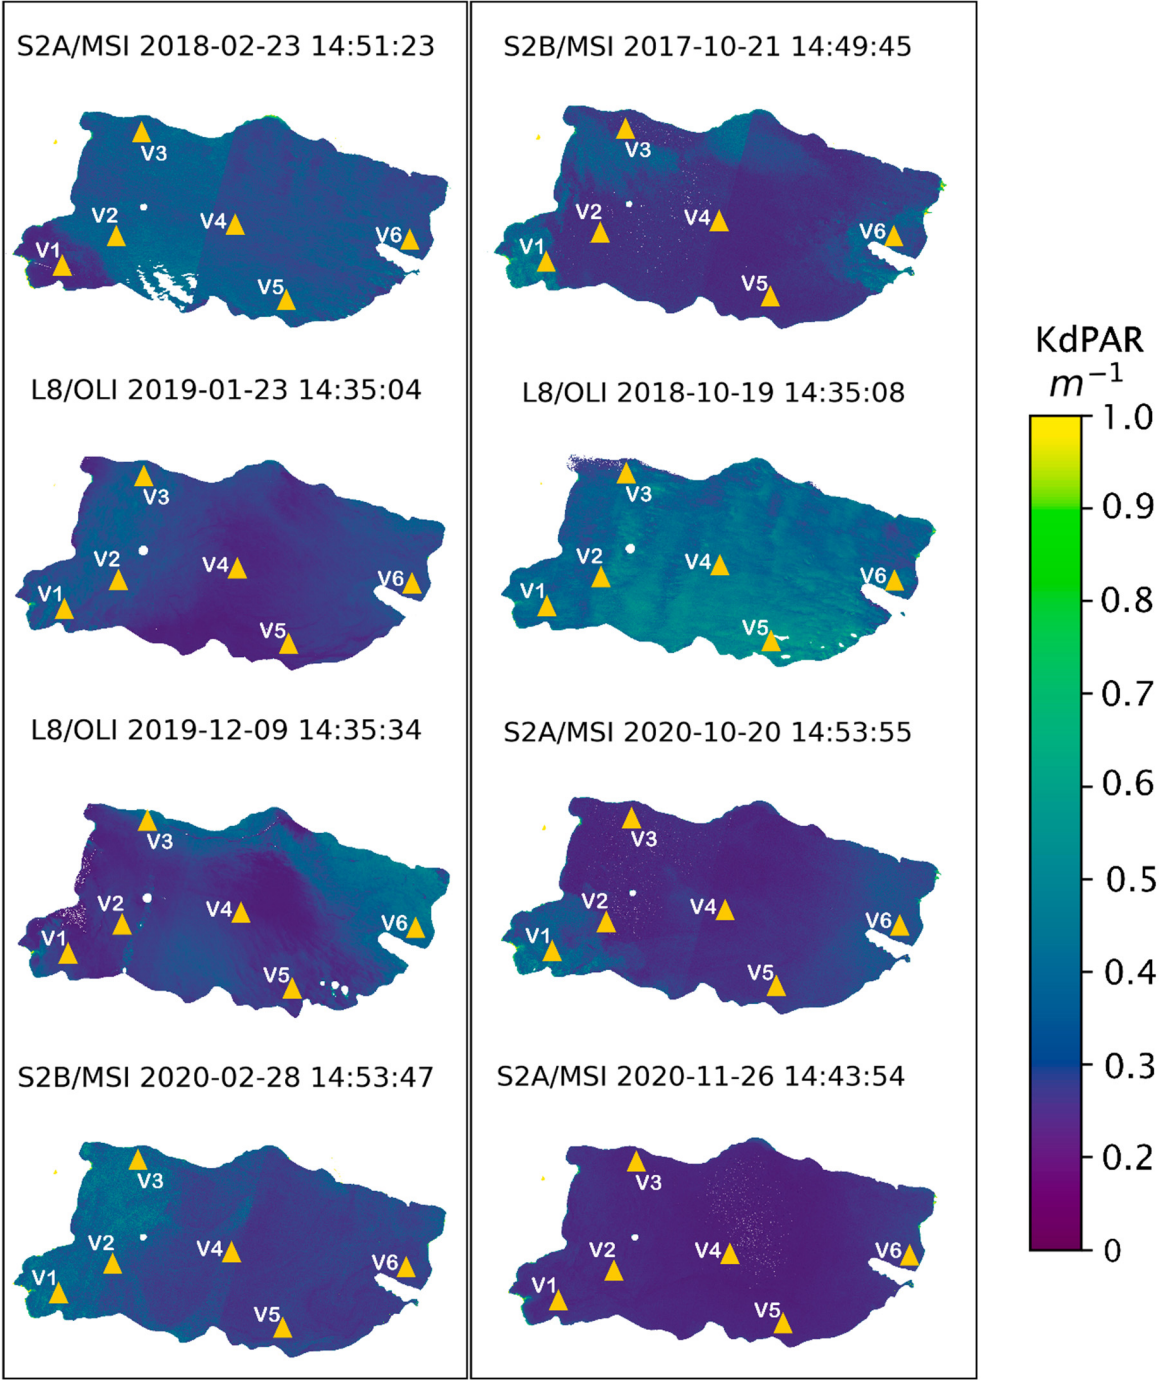



# QAA v6 KPAR Lee

d)

Summer

Spring

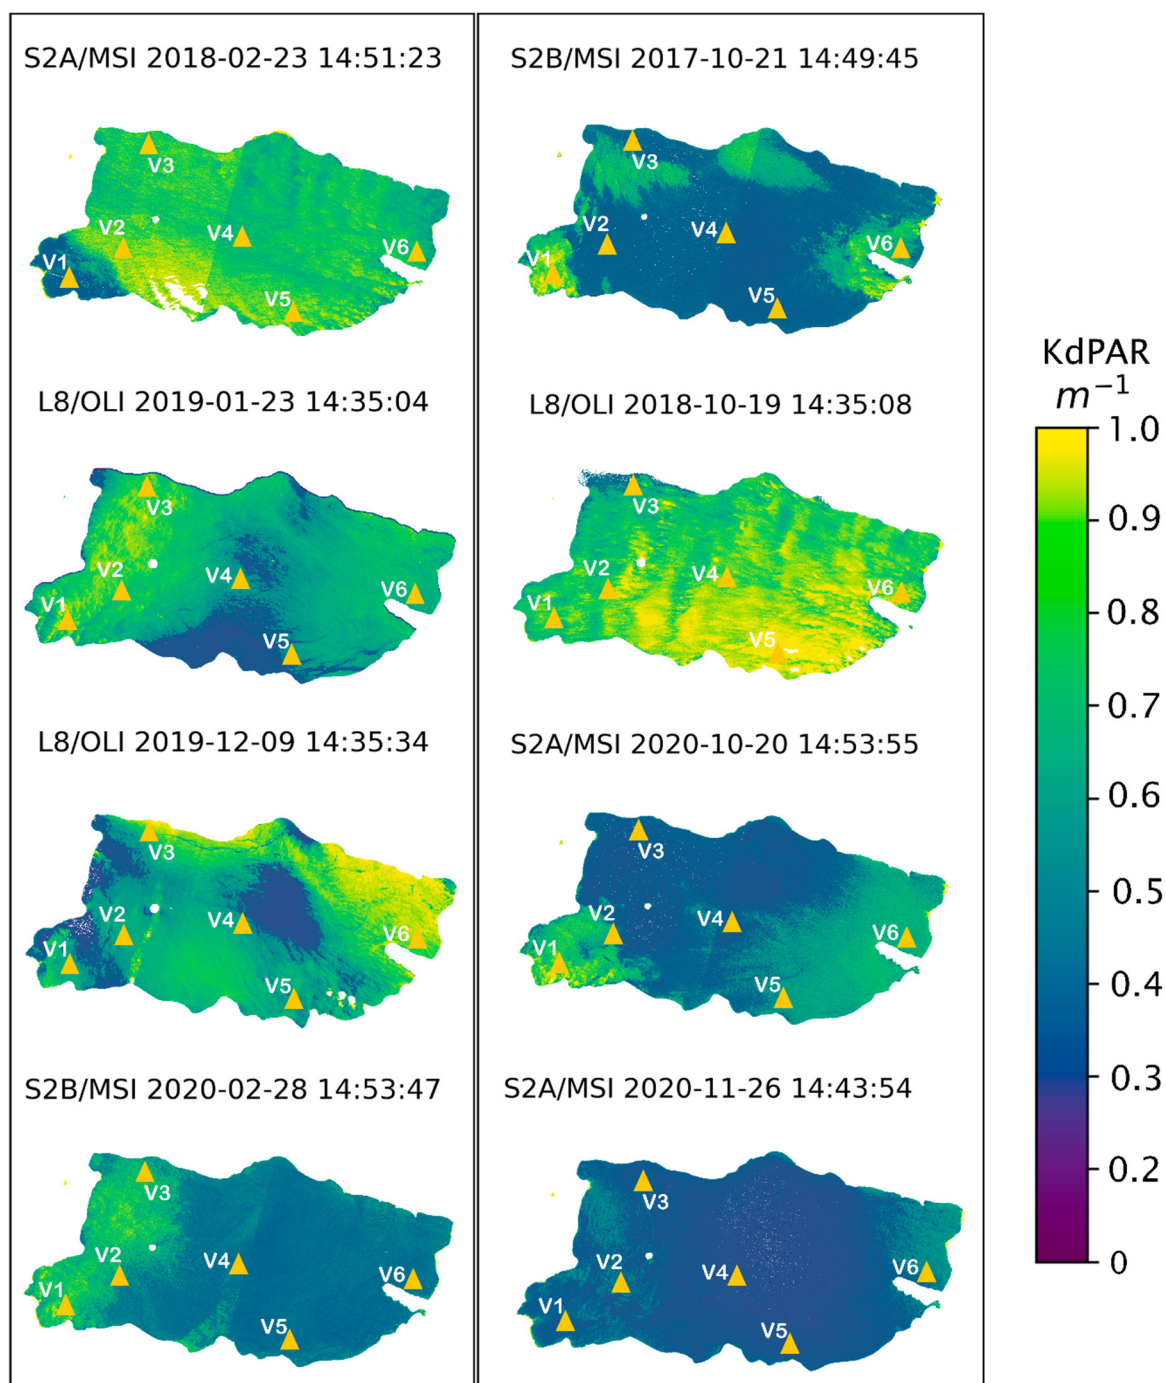

**Figure S1.** Estimation of KdPAR in the Villarrica lake using the four algorithms running in L8/OLI and S2A/MSI images. .
